# Supplementary material for: Incipient microphase separation in short chain perfluoropolyether-block-poly(ethylene oxide) copolymers
Source: Royal Society of Chemistry journal article supplement (doi:10.1039/c7sm00738h), 2017-01-01
Supplement: c7sm00738h1.pdf [file c7sm00738h1.pdf]

## Supporting Information

# Incipient Microphase Separation in Short Chain Perfluoropolyether-*block*-Poly(ethylene oxide) Copolymers

*Mahati Chintapalli*<sup>a,b</sup>, *Ksenia Timachova*<sup>b,c</sup>, *Kevin R. Olson*<sup>d</sup>, *Michał Banaszak*<sup>e</sup>, *Jacob L. Thelen*<sup>c,f</sup>, *Sue J. Meham*<sup>d</sup>, *Joseph M. DeSimone*<sup>d,g</sup>, *Nitash P. Balsara*<sup>\*b,c,f</sup>

### *Wide angle X-ray scattering of PFPE polymers*

In Figure S1, WAXS profiles are shown for various PFPE polymers, at temperatures between 30 °C and 90 °C. The profiles in Figure S1a and S1b, for PFPE<sub>D10</sub>-Diol and PFPE<sub>D10</sub>-DMC, are qualitatively similar to each other, whereas the profiles in Figure S1c, for PFPE<sub>E10</sub>-DMC, are qualitatively similar to those in Figure 1b for PFPE<sub>E10</sub>-Diol.

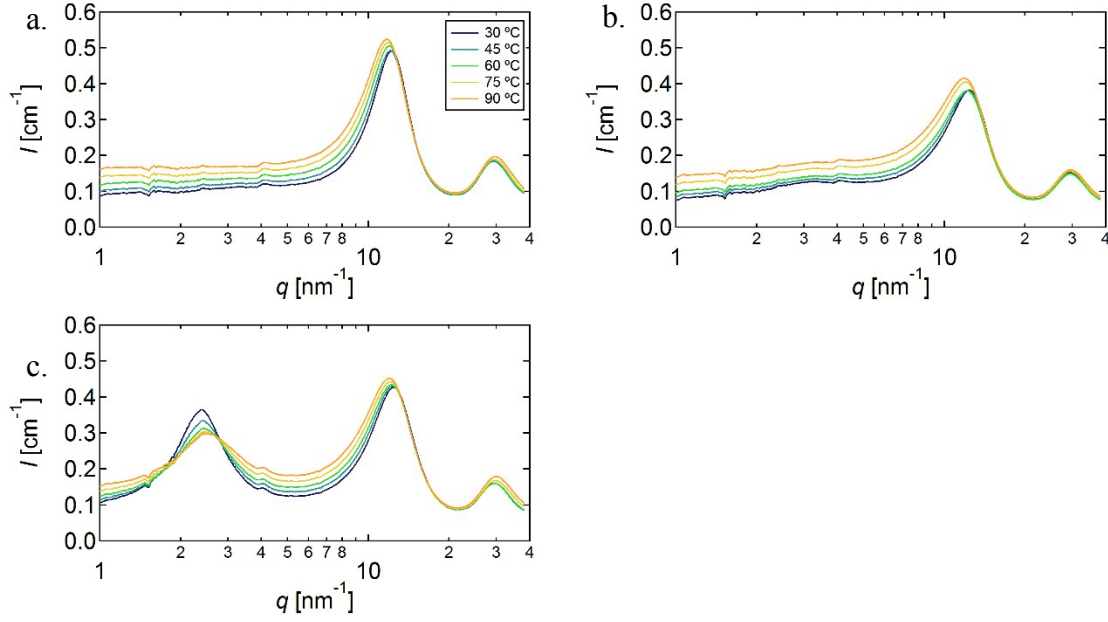

Figure S1. WAXS profiles as a function of temperature for PFPE polymers. In (a-c) WAXS profiles are shown for PFPE<sub>D10</sub>-Diol, PFPE<sub>D10</sub>-DMC, and PFPE<sub>E10</sub>-DMC, respectively.

### Structure Factors

The RPA structure factor is calculated for an ABA triblock of the sequence  $f_1-f_2-f_3$ , an ABABA pentablock of the sequence  $f_1-f_2-f_3-f_4-f_5$ , an ABABABA heptablock of the sequence  $f_1-f_2-f_3-f_4-f_5-f_6-f_7$ , and an ABABABABA nonablock of the sequence  $f_1-f_2-f_3-f_4-f_5-f_6-f_7-f_8-f_9$ . Here,  $f_n$  represents the volume fraction of a specific block in the sequence. For a polymer consisting of  $k$  coupled chains ( $k=1$  is the uncoupled ABA triblock), the individual block fractions can be related to the overall volume fraction of the B block,  $\phi_{PFPE}$ , according to the following equations.

$$f_n = \frac{1 - \phi_{PFPE}}{2k} \quad \text{for terminal A blocks } (n = 1 \text{ or } k) \quad (1)$$

$$f_n = \frac{1 - \phi_{PFPE}}{k} \quad \text{for internal A blocks } (\text{odd } n, \text{ and } n \neq 1 \text{ or } k) \quad (2)$$

$$f_B = \frac{\Phi_{PFPE}}{k} \quad \text{for B blocks, (even } n) \quad (3)$$

The following relationships (equations 4-13) are valid for all of the multiblocks ( $k \geq 1$ ):

$$S(q) = g_{AA}(x) + 2g_{AB}(x) + g_{BB}(x) \quad (4)$$

$$W(q) = g_{AA}(x)g_{BB}(x) - [g_{AB}(x)]^2 \quad (5)$$

$$g_{AB}(x) = g_{BA}(x) \quad (6)$$

$$x \equiv q^2 R_{g,1}^2 \quad (7)$$

$$g^0(x) = \exp(-x) \quad (8)$$

$$g^1(x) = \frac{1 - \exp(-x)}{x} \quad (9)$$

$$g^2(x) = \frac{2(x + \exp(-x) - 1)}{x^2} \quad (10)$$

In equations 11-19,  $n$  is the number labelling the specific block in the sequence.

$$g_{n,n}(x) = f_n^2 g^2(f_n x) \quad (11)$$

$$g_{n,n+1}(x) = f_n f_{n+1} g^1(f_n x) g^1(f_{n+1} x) \quad (12)$$

$$g_{n,n+2}(x) = f_n f_{n+1} f_{n+2} g^1(f_n x) g^0(f_{n+1} x) g^1(f_{n+2} x) \quad (13)$$

In addition to the equations above, equations 14-15 are used for calculation of the pentablock and larger chains ( $k \geq 2$ ):

$$g_{n,n+3}(x) = f_n[f_{n+1} + f_{n+2}]f_{n+3}g^1(f_n x)g^0([f_{n+1} + f_{n+2}]x)g^1(f_{n+3}x) \quad (14)$$

$$g_{n,n+4}(x) = f_n[f_{n+1} + f_{n+2} + f_{n+3}]f_{n+4}g^1(f_n x)g^0([f_{n+1} + f_{n+2} + f_{n+3}]x)g^1(f_{n+4}x) \quad (15)$$

Equations 16-17 are used for calculation of the heptablock and larger chains ( $k \geq 3$ ).

$$g_{n,n+5}(x) = f_n[f_{n+1} + f_{n+2} + f_{n+3} + f_{n+4}]f_{n+5} g^1(f_n x) g^0([f_{n+1} + f_{n+2} + f_{n+3} + f_{n+4}]x) \\ \times g^1(f_{n+5}x) \quad (16)$$

$$g_{n,n+6}(x) = f_n[f_{n+1} + f_{n+2} + f_{n+3} + f_{n+4} + f_{n+5}]f_{n+6} g^1(f_n x) \\ \times g^0([f_{n+1} + f_{n+2} + f_{n+3} + f_{n+4} + f_{n+5}]x) \times g^1(f_{n+6}x) \quad (17)$$

Equations 18-19 are used for calculation of the nonablock ( $k = 4$ ).

$$g_{n,n+7}(x) = f_n[f_{n+1} + f_{n+2} + f_{n+3} + f_{n+4} + f_{n+5} + f_{n+6}]f_{n+7} g^1(f_n x) \\ \times g^0([f_{n+1} + f_{n+2} + f_{n+3} + f_{n+4} + f_{n+5} + f_{n+6}]x) \times g^1(f_{n+7}x) \quad (18)$$

$$g_{n,n+8}(x) = f_n[f_{n+1} + f_{n+2} + f_{n+3} + f_{n+4} + f_{n+5} + f_{n+6} + f_{n+7}]f_{n+8} g^1(f_n x) \\ \times g^0([f_{n+1} + f_{n+2} + f_{n+3} + f_{n+4} + f_{n+5} + f_{n+6} + f_{n+7}]x) \times g^1(f_{n+8}x) \quad (19)$$

For the triblock ( $k=1$ ), the equations 20-22 are used to calculate the terms  $g_{AA}(x)$ ,  $g_{BB}(x)$ , and  $g_{AB}(x)$ . The commas in the subscripts on the right hand side of the equations are removed.

$$g_{AA}(x) = g_{11}(x) + g_{33}(x) + 2g_{13}(x) \quad (20)$$

$$g_{BB}(x) = g_{22}(x) \quad (21)$$

$$g_{AB}(x) = g_{12}(x) + g_{23}(x) \quad (22)$$

For the pentablock ( $k=2$ ), equations 23-25 are used to calculate the terms  $g_{AA}(x)$ ,  $g_{BB}(x)$ , and  $g_{AB}(x)$ .

$$g_{AA}(x) = g_{11}(x) + g_{33}(x) + g_{55}(x) + 2g_{13}(x) + 2g_{15}(x) + 2g_{35}(x) \quad (23)$$

$$g_{BB}(x) = g_{22}(x) + g_{44}(x) + 2g_{24}(x) \quad (24)$$

$$g_{AB}(x) = g_{12}(x) + g_{14}(x) + g_{23}(x) + g_{25}(x) + g_{34}(x) + g_{45}(x) \quad (25)$$

For the heptablock ( $k=3$ ), equations 26-28 are used to calculate the terms  $g_{AA}(x)$ ,  $g_{BB}(x)$ , and  $g_{AB}(x)$ .

$$g_{AA}(x) = g_{11}(x) + g_{33}(x) + g_{55}(x) + g_{77}(x) + 2g_{13}(x) + 2g_{15}(x) + 2g_{17}(x) + 2g_{35}(x) + 2g_{37}(x) + 2g_{57}(x) \quad (26)$$

$$g_{BB}(x) = g_{22}(x) + g_{44}(x) + g_{66}(x) + 2g_{24}(x) + 2g_{26}(x) + 2g_{46}(x) \quad (27)$$

$$\begin{aligned} g_{AB}(x) &= g_{12}(x) + g_{14}(x) + g_{16}(x) + g_{23}(x) + g_{25}(x) + g_{27}(x) + g_{34}(x) + g_{36}(x) + g_{45}(x) + g_{47}(x) + g_{56}(x) \\ &\quad + g_{67}(x) \end{aligned} \quad (28)$$

For the nonablock ( $k=3$ ), equations 29-31 are used to calculate the terms  $g_{AA}(x)$ ,  $g_{BB}(x)$ , and  $g_{AB}(x)$ .

$$\begin{aligned} g_{AA}(x) &= g_{11}(x) + g_{33}(x) + g_{55}(x) + g_{77}(x) + g_{99}(x) + 2g_{13}(x) + 2g_{15}(x) + 2g_{17}(x) + 2g_{19}(x) + 2g_{35}(x) \\ &\quad + 2g_{37}(x) + 2g_{39}(x) + 2g_{57}(x) + 2g_{59}(x) + 2g_{79}(x) \end{aligned} \quad (29)$$

$$g_{BB}(x) = g_{22}(x) + g_{44}(x) + g_{66}(x) + g_{88}(x) + 2g_{24}(x) + 2g_{26}(x) + 2g_{28}(x) + 2g_{46}(x) + 2g_{48}(x) + 2g_{68}(x) \quad (30)$$

$$\begin{aligned}
g_{AB}(x) &= g_{12}(x) + g_{14}(x) + g_{16}(x) + g_{18}(x) + g_{23}(x) + g_{25}(x) + g_{27}(x) + g_{29}(x) + g_{34}(x) + g_{36}(x) + g_{38}(x) \\
&+ g_{45}(x) + g_{47}(x) + g_{49}(x) + g_{56}(x) + g_{58}(x) + g_{67}(x) + g_{69}(x) + g_{78}(x) + g_{89}(x)
\end{aligned}
\tag{31}$$

### *Two Parameter Fits*

In Figure S2, the values for radius of gyration,  $R_{g,1}$ , and Flory-Huggins interaction parameter,  $\chi$ , are given as a function of temperature, determined from a two parameter fit to the RPA model. In this fit, the theoretical value was used for the contrast term,  $c_{th} = 0.17 \text{ cm}^{-1}$ . Qualitatively and quantitatively, the values are in good agreement with the values determined from the three parameter fits (Figure 4). Fits of the form  $\chi = A + B/T$  are shown in Figure S2b. Because the value of  $c$  is fixed, the temperature dependence of  $\chi$  is stronger in Figure S2b than in Figure 4b.

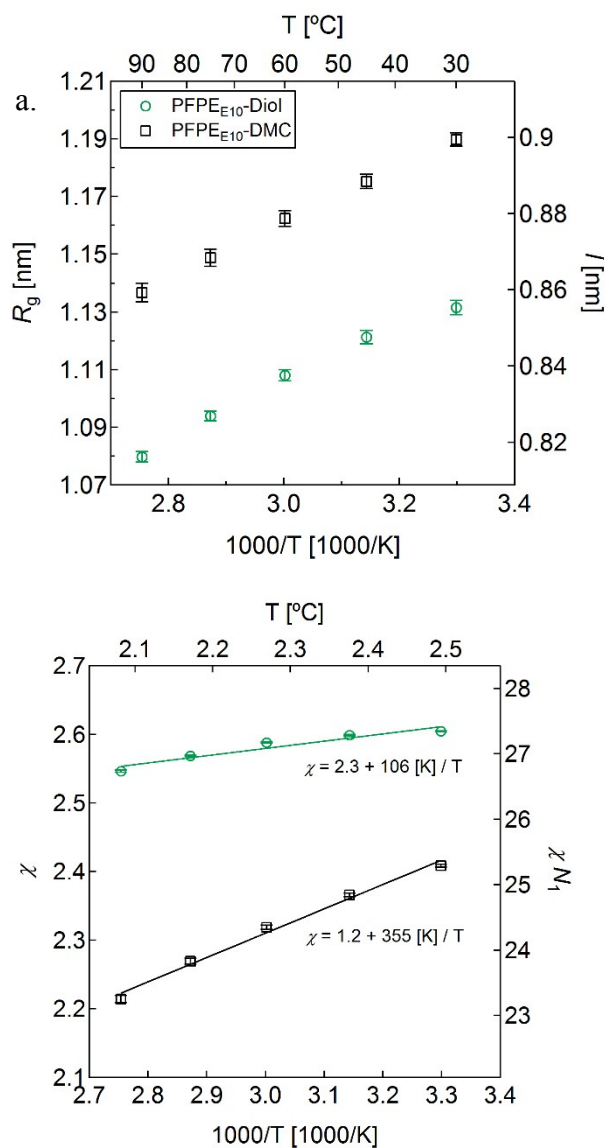

Figure S2. Random phase approximation parameters using a two-parameter fit. In (a), the radius of gyration,  $R_{g,1}$ , is given as a function of temperature, and in (b), the Flory-Huggins interaction parameter,  $\chi$ , is given as a function of temperature. Fits of the form  $\chi = A + B / T$  are shown.

### Background Fit Parameters

The adjustable parameters in the background scattering function,  $a_0$ ,  $a_1$ , and  $a_2$ , are given in Figures S3 and S4. In Figure S3, the background parameters are given for the fit based on the variable  $c$  RPA model, and in Figure S4, the background parameters are given for the fit based on

the fixed  $c$  RPA model. The parameter  $a_0$  represents the constant, temperature-dependent offset in scattering intensity, and the parameters  $a_1$  and  $a_2$  are from the Lorentzian function.

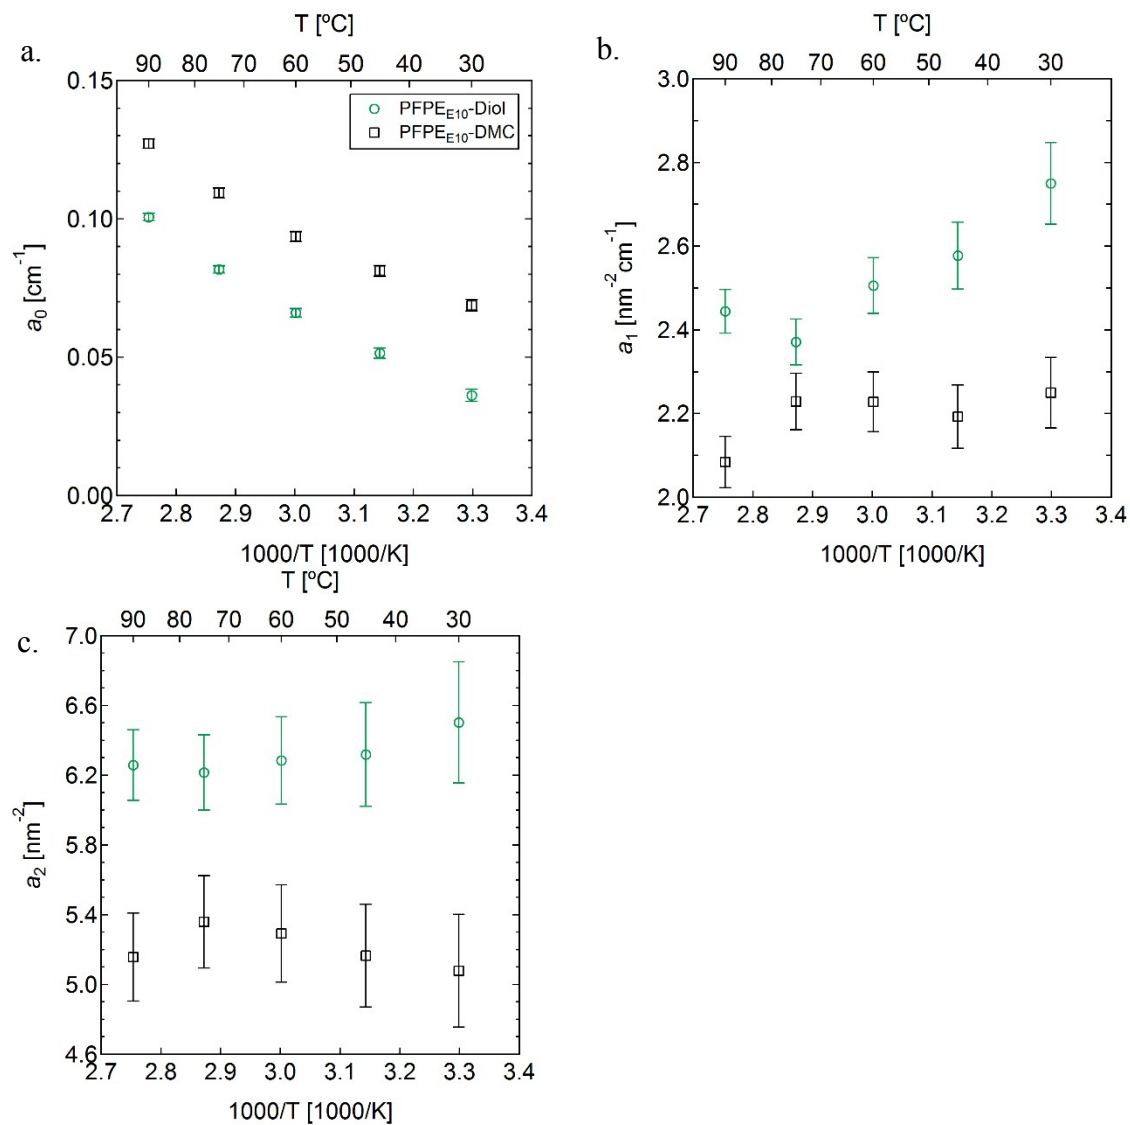

Figure S3. Background fit parameters for the RPA model with variable contrast,  $c$ . The values of the parameters  $a_0$ ,  $a_1$ , and  $a_2$  are given in (a), (b), and (c). Error bars represent the fit uncertainty.



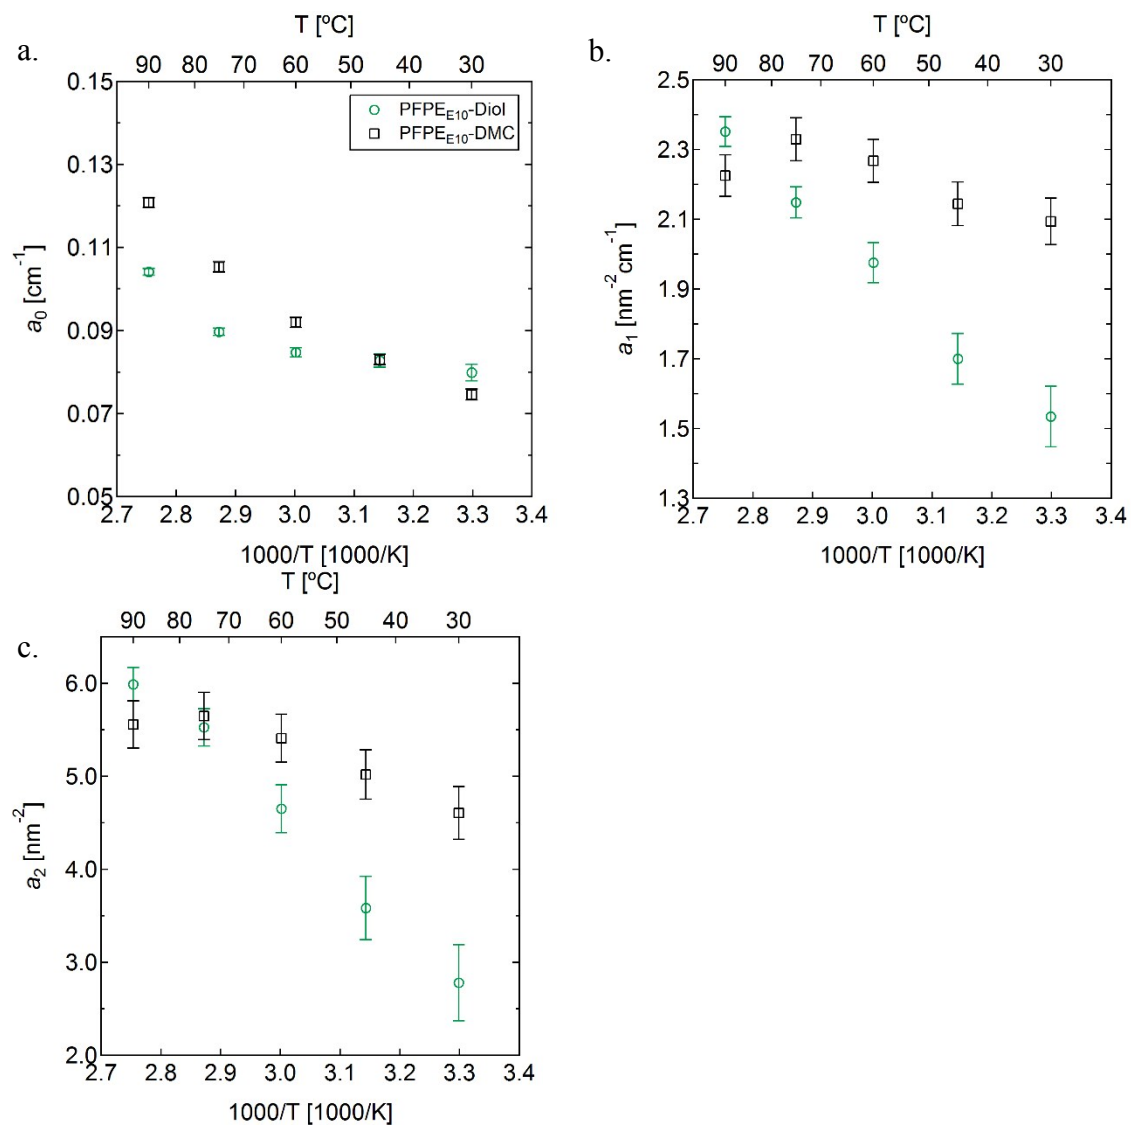

Figure S4. Background fit parameters for the RPA model with fixed contrast,  $c$ . The values of the parameters  $a_0$ ,  $a_1$ , and  $a_2$  are given in (a), (b), and (c). Error bars represent the fit uncertainty.
